# Supplementary material for: Remarkable COx tolerance of Ni3+ active species in a Ni2O3 catalyst for sustained electrochemical urea oxidation
Source: Royal Society of Chemistry journal article supplement (doi:10.1039/d1ta05753g), 2022-01-01
Supplement: d1ta05753g1.pdf [file d1ta05753g1.pdf]

## Supplementary information

### Remarkable CO<sub>x</sub> tolerance of Ni<sup>3+</sup> active species in Ni<sub>2</sub>O<sub>3</sub> catalyst for sustained electrochemical urea oxidation

Muhammed Safeer N. K.,<sup>a,b</sup> Chandraraj Alex,<sup>a</sup> Rajkumar Jana<sup>c</sup>, Ayan Datta<sup>c</sup> Neena S John<sup>a\*</sup>

<sup>a</sup>Centre for Nano and Soft Matter Sciences, Shivanapura, Bengaluru 562162, India

<sup>b</sup>Manipal Academy of Higher Education, Manipal 576104, India

<sup>c</sup>School of Chemical Sciences, Indian Association for the Cultivation of Science (IACS),  
Kolkata 700032, India

Corresponding author Email: [jsneena@cens.res.in](mailto:jsneena@cens.res.in)

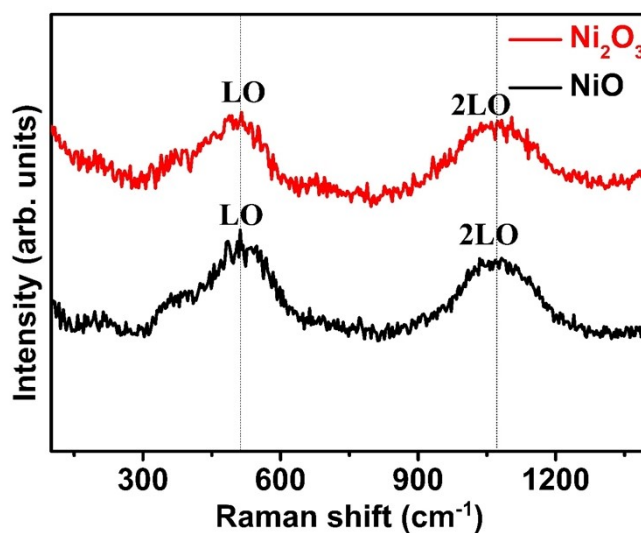

Figure S1. Raman spectra of NiO and Ni<sub>2</sub>O<sub>3</sub>

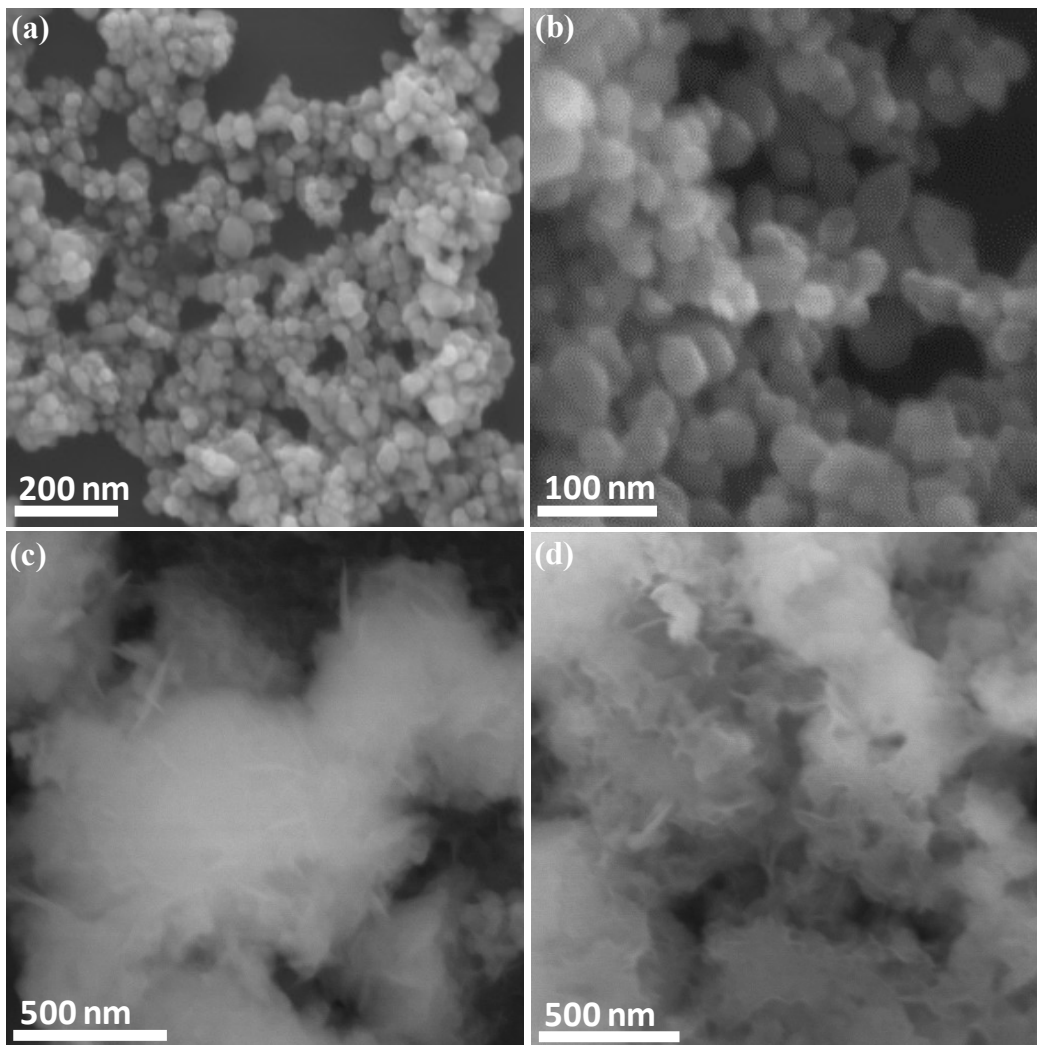

**Figure S2.** FESEM images of (a, b) NiO and (c, d) Ni<sub>2</sub>O<sub>3</sub>.

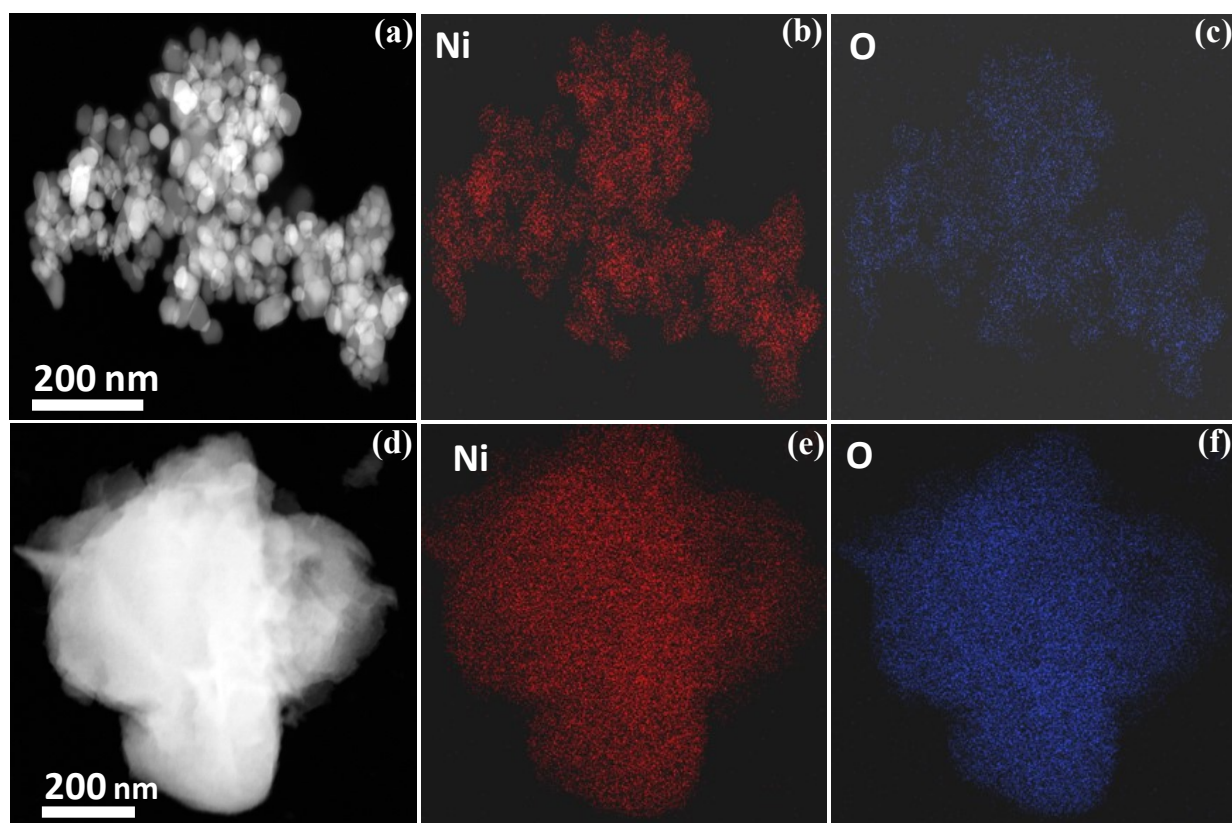

**Figure S3.** HAADF images and EDS elemental mapping of (a, b and c) NiO and (d, e and f) Ni<sub>2</sub>O<sub>3</sub> in STEM mode.

**Table S1.** Elemental composition of nickel and oxygen in NiO and Ni<sub>2</sub>O<sub>3</sub> from TEM

| NiO            |                 |                   | Ni <sub>2</sub> O <sub>3</sub> |                 |                   |
|----------------|-----------------|-------------------|--------------------------------|-----------------|-------------------|
| <i>Element</i> | <i>Atomic %</i> | <i>O/Ni Ratio</i> | <i>Element</i>                 | <i>Atomic %</i> | <i>O/Ni Ratio</i> |
| Nickel         | 40.33           | 1.48              | Nickel                         | 22.31           | 3.48              |
| Oxygen         | 59.66           |                   | Oxygen                         | 77.68           |                   |

**Table S2.** Percentage of oxygen from deconvoluting O1s spectra of NiO and Ni<sub>2</sub>O<sub>3</sub>

| Sample                         | O <sub>1</sub> (%) – lattice oxygen | O <sub>2</sub> (%) – adsorbed oxygen | O <sub>3</sub> (%) – hydroxide |
|--------------------------------|-------------------------------------|--------------------------------------|--------------------------------|
| NiO                            | 57.7 %                              | 42.3 %                               | -----                          |
| Ni <sub>2</sub> O <sub>3</sub> | 43.4 %                              | 41.5 %                               | 15.1 %                         |

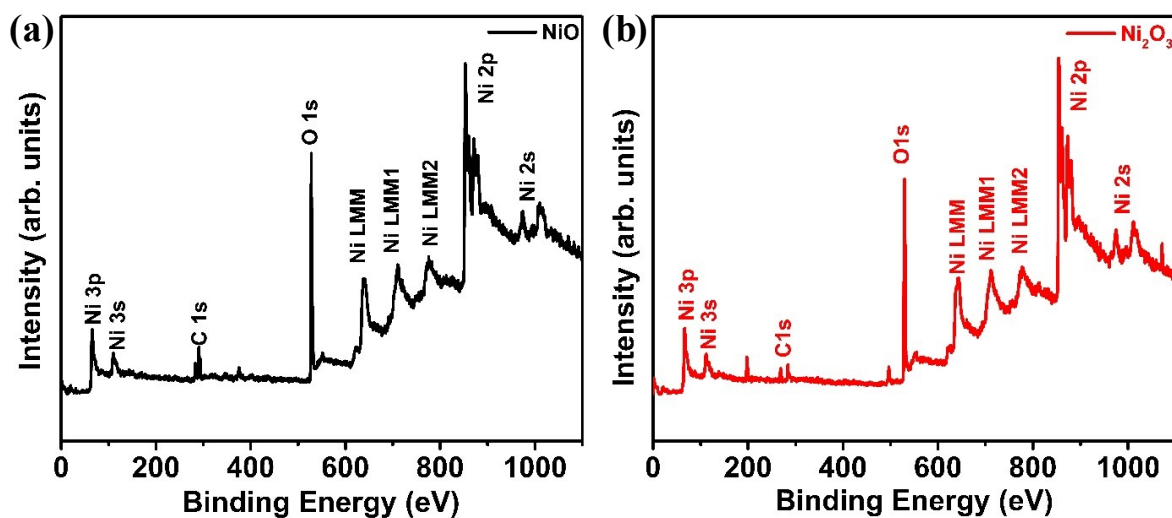

Figure S4. XPS survey spectra of (a) NiO and (b) Ni<sub>2</sub>O<sub>3</sub>.

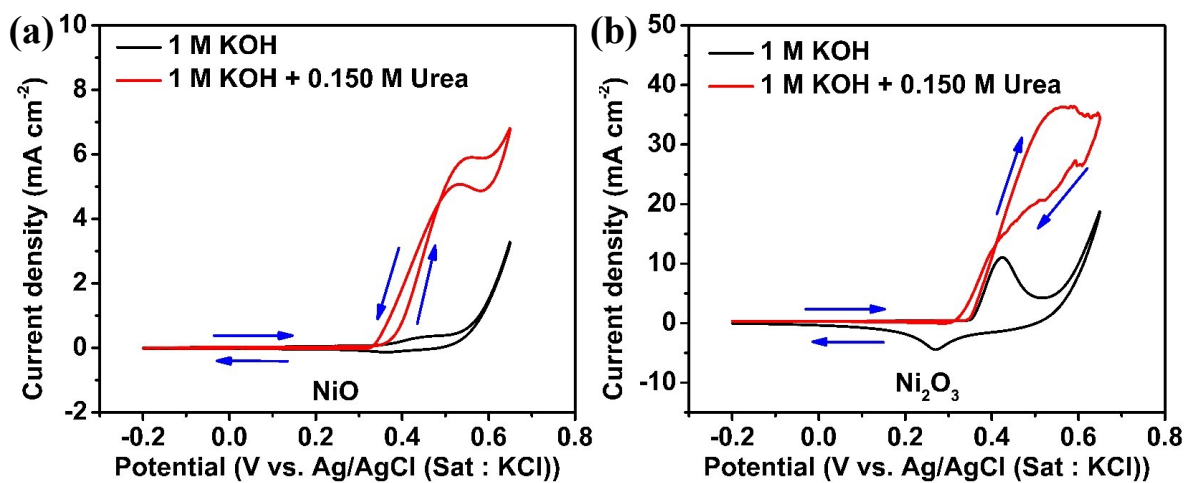

Figure S5. CV of (a) NiO and (b) Ni<sub>2</sub>O<sub>3</sub> in 1 M KOH and 1 M KOH + 0.150 M urea at a scan rate of 10 mV s<sup>-1</sup>

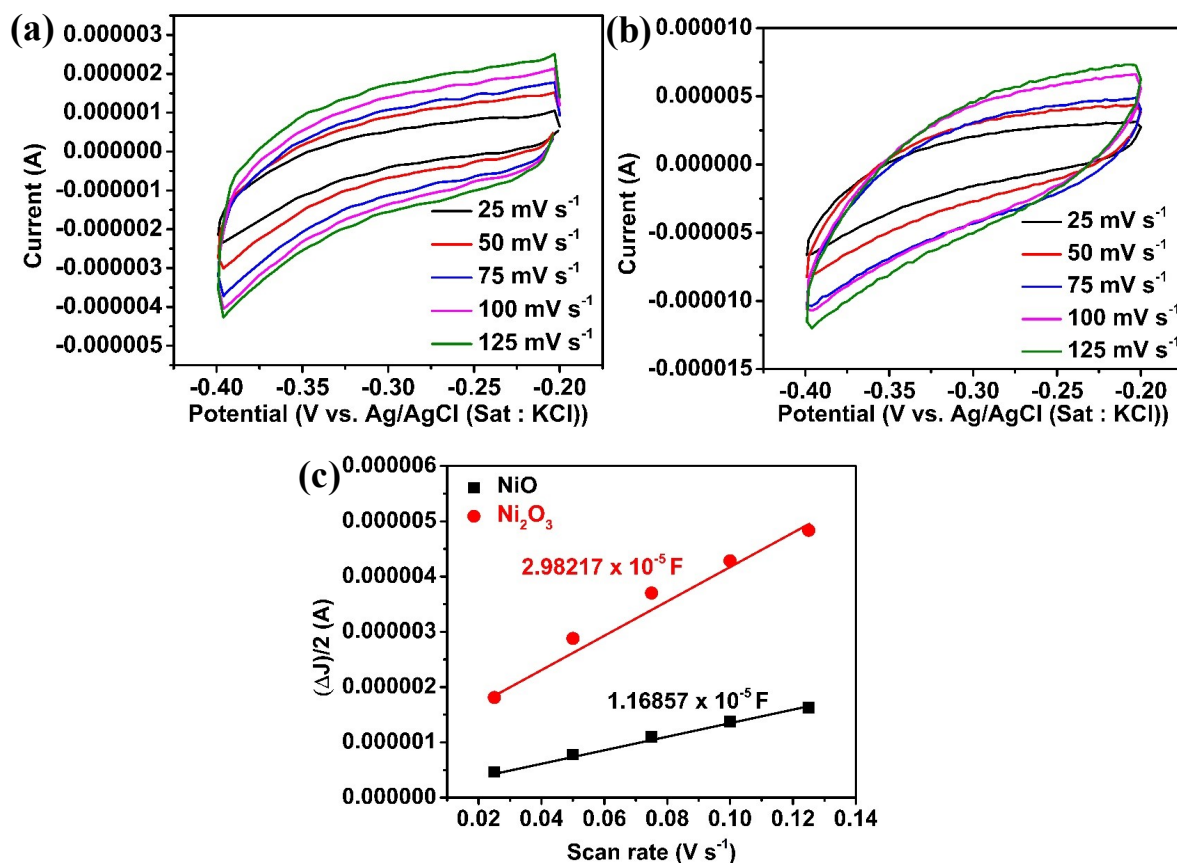

**Figure S6.** CV of (a) NiO and (b) Ni<sub>2</sub>O<sub>3</sub> at various scan rates (25 - 125 mV s<sup>-1</sup>) in 1 M KOH in the region of -0.4 to -0.2 V vs. Ag/AgCl<sub>(sat.KCl)</sub> and (c) The capacitive current densities at -0.30 V vs. Ag/AgCl<sub>(sat.KCl)</sub> as a function of scan rates for NiO and Ni<sub>2</sub>O<sub>3</sub>

**Calculation:**

(1) ECSA of NiO :  $C_{dl} / C_{sp} = (11.6857 \times 10^{-6}) \text{ F} / (40 \times 10^{-6}) \text{ F/cm}^{-2} = 0.29 \text{ cm}^2$

(2) ECSA of Ni<sub>2</sub>O<sub>3</sub> :  $C_{dl} / C_{sp} = (29.8217 \times 10^{-6}) \text{ F} / (40 \times 10^{-6}) \text{ F/cm}^{-2} = 0.74 \text{ cm}^2$

(C<sub>sp</sub> = average specific capacitance Ni<sub>x</sub>O<sub>y</sub> systems<sup>1</sup>)

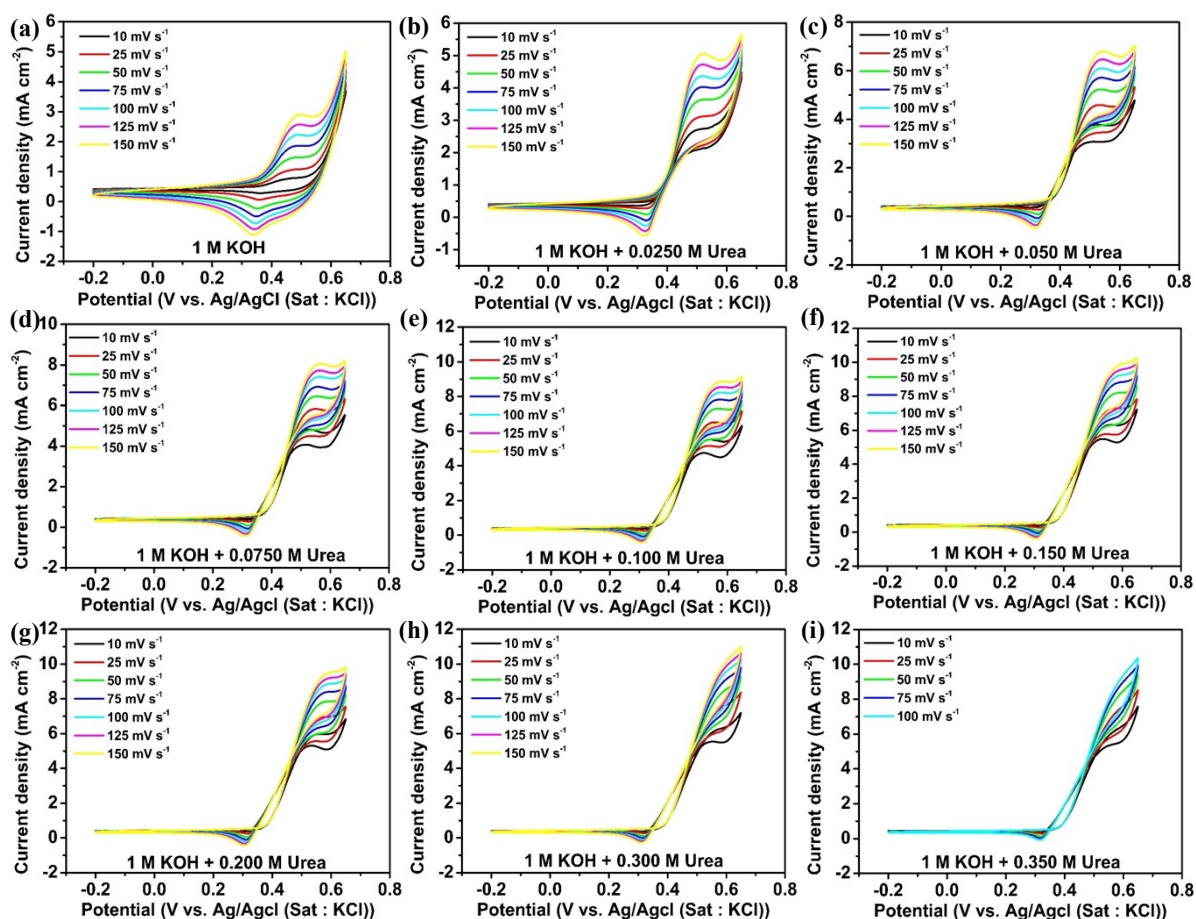

**Figure S7.** CVs showing UOR activity of NiO catalyst in 1 M KOH containing different urea concentration at various scan rates from 10 - 150  $\text{mV s}^{-1}$  (a) 0.000 M urea, (b) 0.025 M urea, (c) 0.050 M urea, (d) 0.075 M urea, (e) 0.100 M urea, (f) 0.150 M urea, (g) 0.200 M urea, (h) 0.300 M urea and (i) 0.350 M urea.

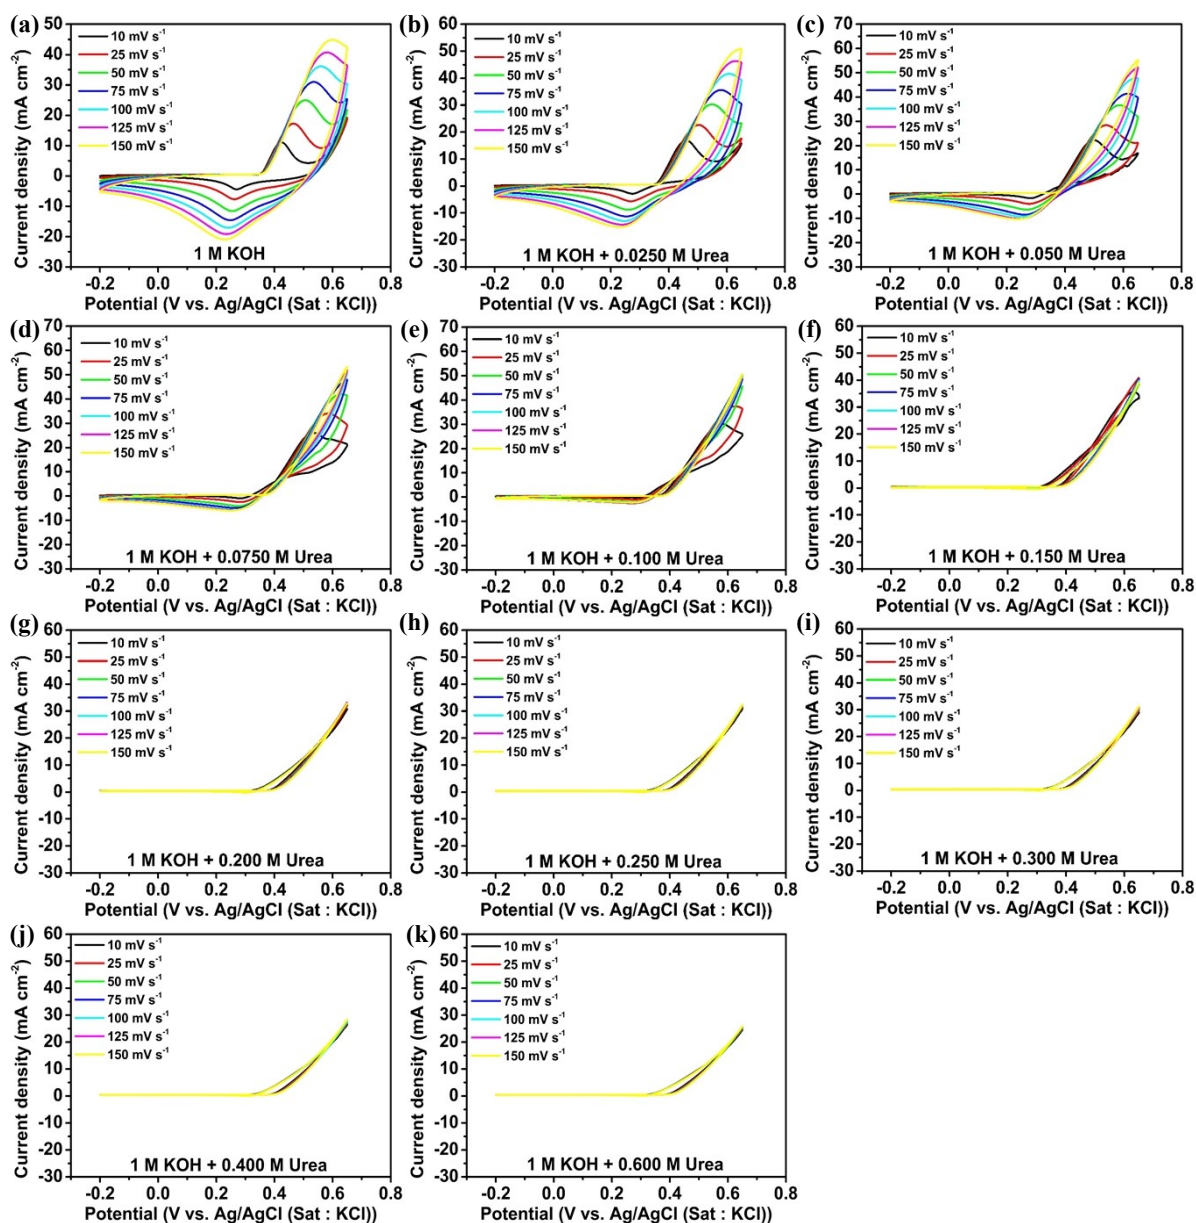

**Figure S8.** CVs showing UOR activity of  $\text{Ni}_2\text{O}_3$  catalyst in 1 M KOH containing different urea concentration at various scan rates from 10 - 150  $\text{mV s}^{-1}$  (a) 0.000 M urea, (b) 0.025 M urea, (c) 0.050 M urea, (d) 0.075 M urea, (e) 0.100 M urea, (f) 0.150 M urea, (g) 0.200 M urea, (h) 0.250 M urea, (i) 0.300 M urea, (j) 0.400 M urea and (k) 0.600 M urea.

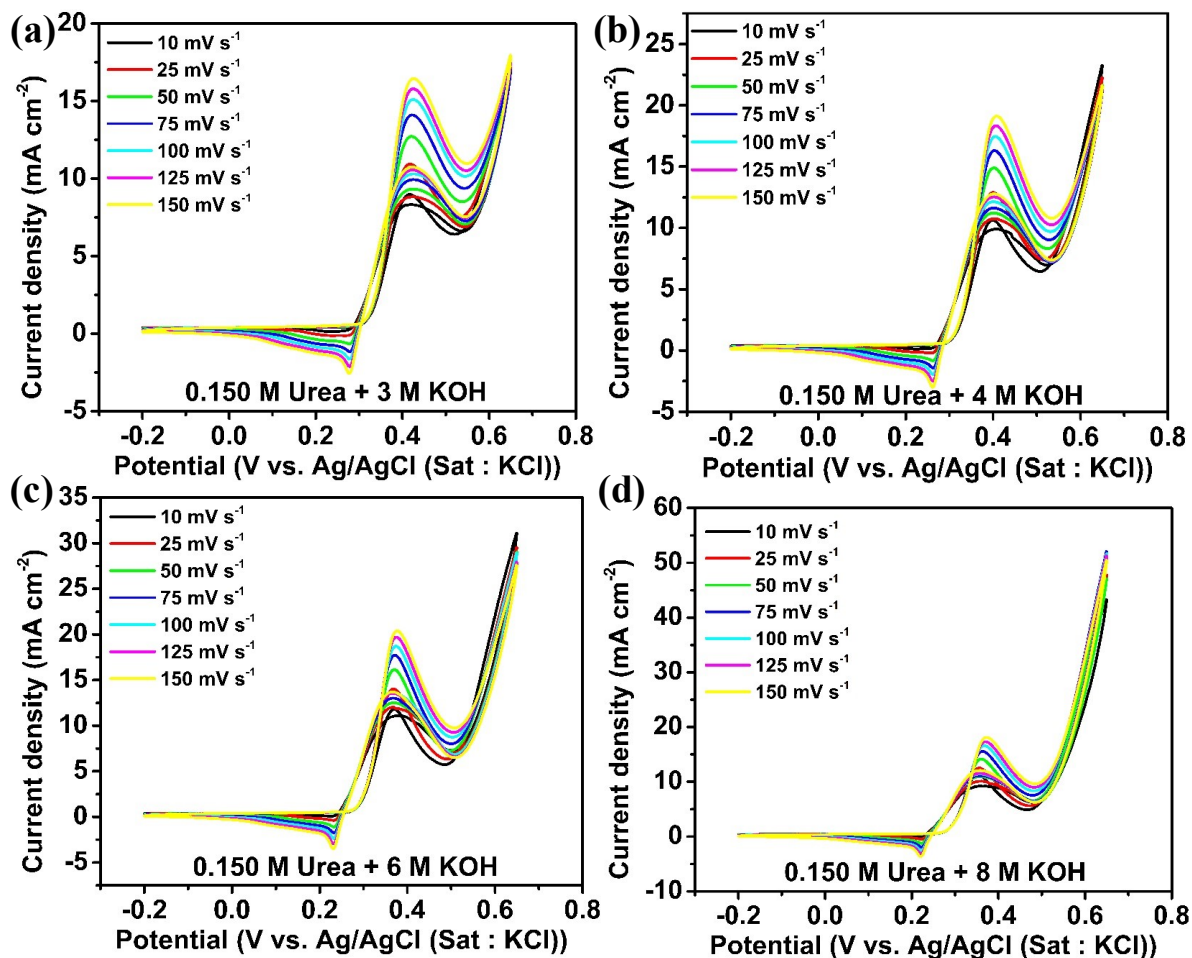

**Figure S9.** CVs showing UOR activity of NiO catalyst in different molar KOH solution containing 0.150 M urea acquired at various scan rates, 10 - 150  $\text{mV s}^{-1}$  (a) 3 M KOH, (b) 4 M KOH, (c) 6 M KOH and (d) 8 M KOH.



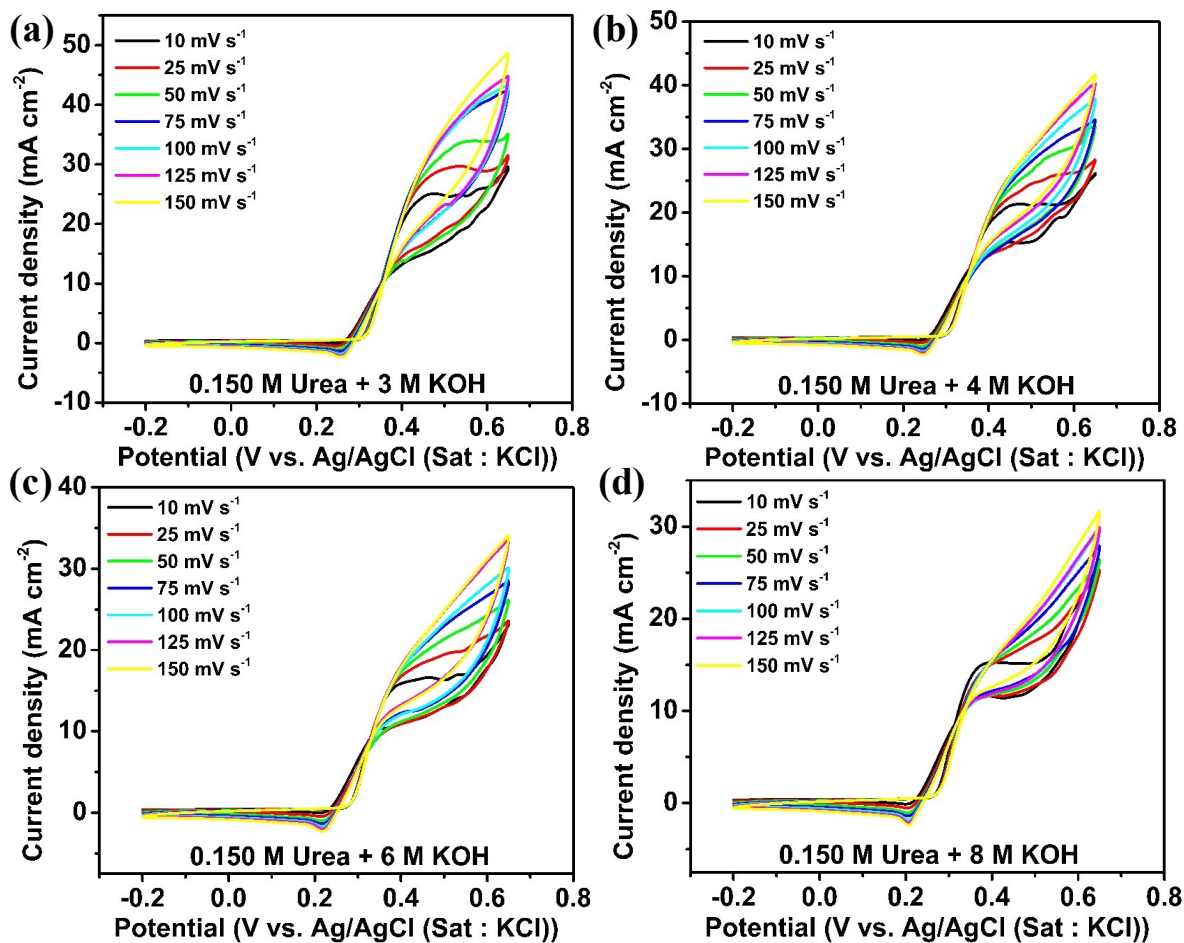

**Figure S10.** CVs showing UOR activity of  $\text{Ni}_2\text{O}_3$  catalyst in different molar KOH solution containing 0.150 M urea acquired at various scan rates, 10 - 150  $\text{mV s}^{-1}$  (a) 3 M KOH, (b) 4 M KOH, (c) 6 M KOH and (d) 8 M KOH.

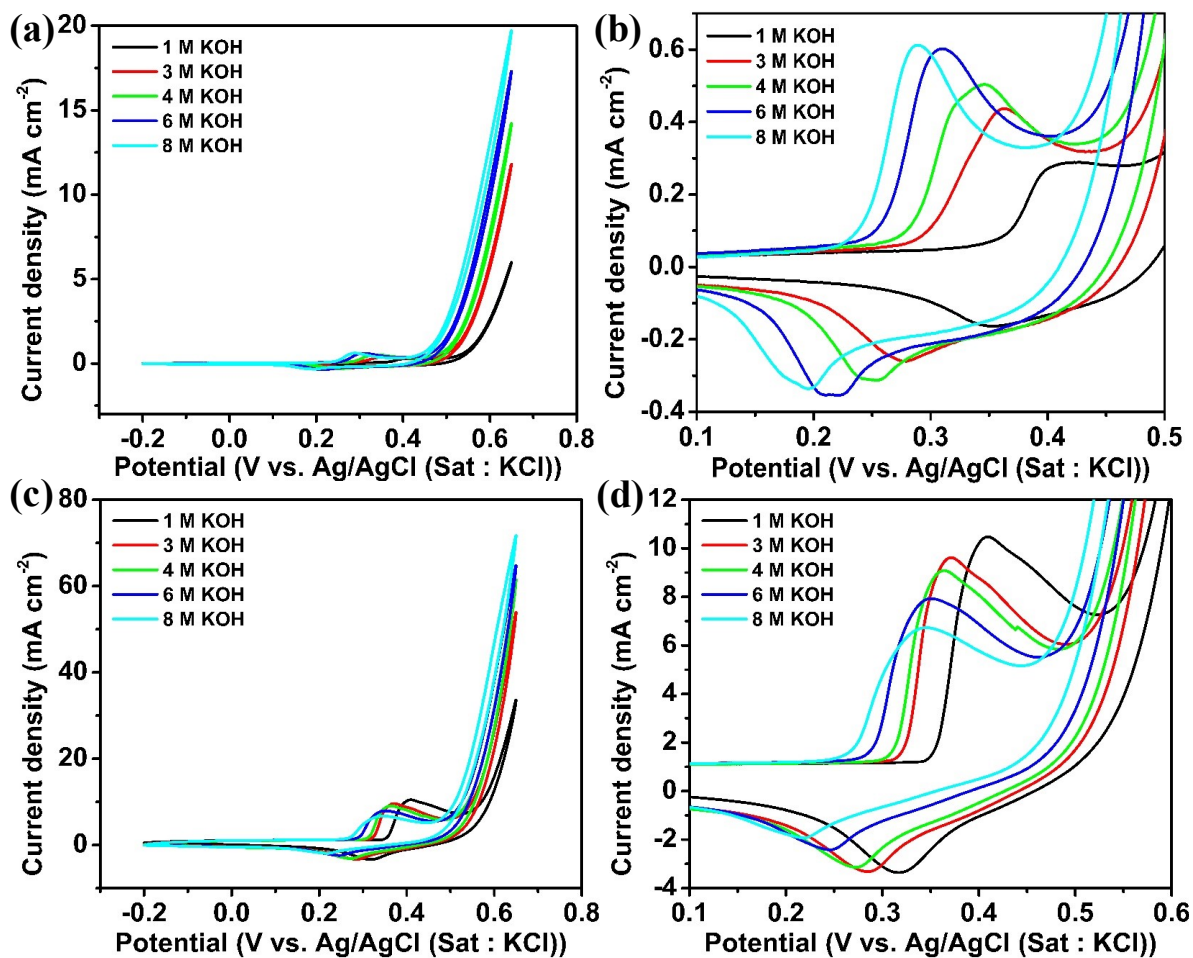

**Figure S11.** CVs of (a) NiO, (b) magnified view, (c) Ni<sub>2</sub>O<sub>3</sub> (d) magnified view, in 1 to 8 M KOH at a scan rate of 10 mV s<sup>-1</sup>.

**Table S3.** Applied potential values at which the  $Z_{\text{real}}$  (real impedance) showing positive and negative values at different concentrations of KOH electrolyte solution containing 0.150 M urea for NiO and Ni<sub>2</sub>O<sub>3</sub>.

| <b>NiO</b>                                   |                                            |                                               |                                              |                                            |                                               |                                              |                                            |                                               |
|----------------------------------------------|--------------------------------------------|-----------------------------------------------|----------------------------------------------|--------------------------------------------|-----------------------------------------------|----------------------------------------------|--------------------------------------------|-----------------------------------------------|
| <i>1 M KOH + 0.150 M Urea</i>                |                                            |                                               | <i>3 M KOH + 0.150 M Urea</i>                |                                            |                                               | <i>6 M KOH + 0.150 M Urea</i>                |                                            |                                               |
| Positive $Z_{\text{real}}$ (Lower potential) | Negative $Z_{\text{real}}$ (Mid potential) | Positive $Z_{\text{real}}$ (Higher potential) | Positive $Z_{\text{real}}$ (Lower potential) | Negative $Z_{\text{real}}$ (Mid potential) | Positive $Z_{\text{real}}$ (Higher potential) | Positive $Z_{\text{real}}$ (Lower potential) | Negative $Z_{\text{real}}$ (Mid potential) | Positive $Z_{\text{real}}$ (Higher potential) |
| 0.34 V                                       | 0.48 V                                     | 0.56 V                                        | 0.30 V                                       | 0.40 V                                     | 0.52 V                                        | 0.26 V                                       | 0.36 V                                     | 0.48 V                                        |
| 0.36 V                                       | 0.52 V                                     | 0.58 V                                        | 0.34 V                                       | 0.44 V                                     | 0.56 V                                        | 0.30 V                                       | 0.38 V                                     | 0.52 V                                        |
| 0.38 V                                       | -----                                      | 0.60 V                                        | 0.36 V                                       | 0.48 V                                     | 0.58 V                                        | 0.34 V                                       | 0.40 V                                     | 0.56 V                                        |
| 0.40 V                                       | -----                                      | 0.64 V                                        | 0.38 V                                       | -----                                      | 0.60 V                                        | -----                                        | 0.44 V                                     | 0.58 V                                        |
| 0.44 V                                       | -----                                      | -----                                         | -----                                        | -----                                      | 0.64 V                                        | -----                                        | -----                                      | 0.60 V                                        |
| -----                                        | -----                                      | -----                                         | -----                                        | -----                                      | -----                                         | -----                                        | -----                                      | 0.64 V                                        |
| <b>Ni<sub>2</sub>O<sub>3</sub></b>           |                                            |                                               |                                              |                                            |                                               |                                              |                                            |                                               |
| <i>1 M KOH + 0.150 M Urea</i>                |                                            |                                               | <i>3 M KOH + 0.150 M Urea</i>                |                                            |                                               | <i>6 M KOH + 0.150 M Urea</i>                |                                            |                                               |
| Positive $Z_{\text{real}}$ (Lower potential) | Negative $Z_{\text{real}}$ (Mid potential) | Positive $Z_{\text{real}}$ (Higher potential) | Positive $Z_{\text{real}}$ (Lower potential) | Negative $Z_{\text{real}}$ (Mid potential) | Positive $Z_{\text{real}}$ (Higher potential) | Positive $Z_{\text{real}}$ (Lower potential) | Negative $Z_{\text{real}}$ (Mid potential) | Positive $Z_{\text{real}}$ (Higher potential) |
| 0.34 V                                       | 0.48 V                                     | 0.64 V                                        | 0.30 V                                       | 0.36 V                                     | 0.52 V                                        | 0.26 V                                       | 0.38 V                                     | 0.50 V                                        |
| 0.36 V                                       | 0.50 V                                     | -----                                         | 0.32 V                                       | 0.38 V                                     | 0.56 V                                        | 0.30 V                                       | 0.40 V                                     | 0.52 V                                        |
| 0.38 V                                       | 0.52 V                                     | -----                                         | 0.34 V                                       | 0.40 V                                     | 0.58 V                                        | 0.32 V                                       | 0.44 V                                     | 0.56 V                                        |
| 0.40 V                                       | 0.56 V                                     | -----                                         | -----                                        | 0.44 V                                     | 0.60 V                                        | 0.34 V                                       | 0.48 V                                     | 0.58 V                                        |
| 0.44 V                                       | 0.58 V                                     | -----                                         | -----                                        | 0.50 V                                     | 0.64 V                                        | 0.36 V                                       | -----                                      | 0.60 V                                        |
| -----                                        | 0.60 V                                     | -----                                         | -----                                        | -----                                      | -----                                         | -----                                        | -----                                      | 0.64 V                                        |

**Table S4.** Frequency range at which the  $-$ phase angle between ( $+90^\circ$  to  $+180^\circ$ ) and ( $-90^\circ$  to  $-180^\circ$ ) for NiO and Ni<sub>2</sub>O<sub>3</sub> in different molar KOH solution containing 0.150 M urea.

| <b>NiO</b>                                                                                                     |                                                            |                                                                                                             |                                                            |                                                                                                                |                                                            |
|----------------------------------------------------------------------------------------------------------------|------------------------------------------------------------|-------------------------------------------------------------------------------------------------------------|------------------------------------------------------------|----------------------------------------------------------------------------------------------------------------|------------------------------------------------------------|
| <i>1 M KOH +0.150 M Urea</i>                                                                                   |                                                            | <i>3 M KOH +0.150 M Urea</i>                                                                                |                                                            | <i>6 M KOH +0.150 M Urea</i>                                                                                   |                                                            |
| Potential @ -<br>Phase angle<br>between ( $+90^\circ$<br>to $+180^\circ$ ) and ( $-$<br>$90^\circ$ to $-180$ ) | Frequency<br>Range (Hz)<br><b>(No. Of data<br/>points)</b> | Potential @ -<br>Phase angle<br>between ( $+90^\circ$ to<br>$+180^\circ$ ) and ( $-90^\circ$ to<br>$-180$ ) | Frequency<br>Range (Hz)<br><b>(No. Of data<br/>points)</b> | Potential @ -<br>Phase angle<br>between ( $+90^\circ$<br>to $+180^\circ$ ) and ( $-$<br>$90^\circ$ to $-180$ ) | Frequency<br>Range (Hz)<br><b>(No. Of data<br/>points)</b> |
| 0.48 V                                                                                                         | $10^{-0.50} - 10^{-2.0}$<br><b>(18 out of 19)</b>          | 0.40 V                                                                                                      | $10^{-0.83} - 10^{-2.0}$<br><b>(12 out of 15)</b>          | 0.36 V                                                                                                         | $10^{-0.33} - 10^{-2.0}$<br><b>(21 out of 22)</b>          |
| 0.52 V                                                                                                         | $10^{0.42} - 10^{-2.0}$<br><b>(28 out of 30)</b>           | 0.44 V                                                                                                      | $10^{0.58} - 10^{-2.0}$<br><b>(30 out of 32)</b>           | 0.38 V                                                                                                         | $10^{0.58} - 10^{-2.0}$<br><b>(30 out of 32)</b>           |
| -----                                                                                                          | -----                                                      | 0.48 V                                                                                                      | $10^{0.75} - 10^{-2.0}$<br><b>(32 out of 34)</b>           | 0.40 V                                                                                                         | $10^{0.67} - 10^{-2.0}$<br><b>(32 out of 33)</b>           |
| -----                                                                                                          | -----                                                      | -----                                                                                                       | -----                                                      | 0.44 V                                                                                                         | $10^{0.67} - 10^{-2.0}$<br><b>(31 out of 33)</b>           |
| <b>Ni<sub>2</sub>O<sub>3</sub></b>                                                                             |                                                            |                                                                                                             |                                                            |                                                                                                                |                                                            |
| <i>1 M KOH +0.150 M Urea</i>                                                                                   |                                                            | <i>3 M KOH +0.150 M Urea</i>                                                                                |                                                            | <i>6 M KOH +0.150 M Urea</i>                                                                                   |                                                            |
| Potential @<br>-Phase angle<br>between ( $+90^\circ$<br>to $+180^\circ$ ) and<br>( $-90^\circ$ to $-180$ )     | Frequency<br>Range (Hz)<br><b>(No. Of data<br/>points)</b> | Potential @ -<br>Phase angle<br>between ( $+90^\circ$ to<br>$+180^\circ$ ) and ( $-90^\circ$ to<br>$-180$ ) | Frequency<br>Range (Hz)<br><b>(No. Of data<br/>points)</b> | Potential @<br>-Phase angle<br>between ( $+90^\circ$<br>to $+180^\circ$ ) and<br>( $-90^\circ$ to $-180$ )     | Frequency<br>Range (Hz) <b>(No.<br/>Of data points)</b>    |
| 0.48 V                                                                                                         | $10^{-1.5} - 10^{-2.0}$<br><b>(6 out of 7)</b>             | 0.36 V                                                                                                      | $10^{-1.83} - 10^{-2.0}$<br><b>(1 out of 3)</b>            | 0.38 V                                                                                                         | $10^{-0.25} - 10^{-2.0}$<br><b>(20 out of 22)</b>          |
| 0.50 V                                                                                                         | $10^{-0.92} - 10^{-2.0}$<br><b>(4 out of 14)</b>           | 0.40 V                                                                                                      | $10^{-1.33} - 10^{-2.0}$<br><b>(1 out of 8)</b>            | 0.40 V                                                                                                         | $10^{0.25} - 10^{-2.0}$<br><b>(27 out of 28)</b>           |
| 0.52 V                                                                                                         | $10^{-0.92} - 10^{-2.0}$<br><b>(5 out of 14)</b>           | 0.44 V                                                                                                      | $10^{-1.25} - 10^{-2.0}$<br><b>(6 out of 10)</b>           | 0.44 V                                                                                                         | $10^{0.25} - 10^{-2.0}$<br><b>(26 out of 28)</b>           |
| 0.56 V                                                                                                         | $10^{-1.2} - 10^{-2.0}$<br><b>(3 out of 12)</b>            | 0.50 V                                                                                                      | $10^{-1.67} - 10^{-2.0}$<br><b>(1 out of 5)</b>            | 0.48 V                                                                                                         | $10^{-0.338} - 10^{-2.0}$<br><b>(13 out of 21)</b>         |
| 0.58 V                                                                                                         | $10^{-0.42} - 10^{-2.0}$<br><b>(3 out of 17)</b>           | -----                                                                                                       | -----                                                      | -----                                                                                                          | -----                                                      |
| 0.60 V                                                                                                         | $10^{-0.083} - 10^{-2.0}$<br><b>(4 out of 24)</b>          | -----                                                                                                       | -----                                                      | -----                                                                                                          | -----                                                      |

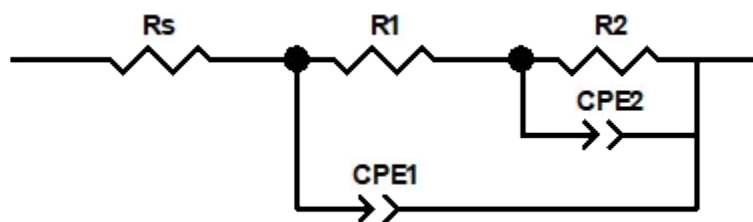

**Figure S12.** Equivalent circuit for modeling electrochemical urea oxidation on NiO and Ni<sub>2</sub>O<sub>3</sub> catalyst

**Table S5.** Impedance analysis of NiO and Ni<sub>2</sub>O<sub>3</sub> in different molar KOH + 0.150 M urea at various potentials. Fitted values based on equivalent circuit given in Fig. S12.

| <i>1 M KOH + 0.150 M Urea - NiO</i> |       |       |       |                         |         |                         |         |                |
|-------------------------------------|-------|-------|-------|-------------------------|---------|-------------------------|---------|----------------|
| Potential (V)                       | Rs    | R1    | R2    | CPE 2-T                 | CPE2-P  | CPE 1-T                 | CPE1-P  | X <sup>2</sup> |
| 0.34 V                              | 16.91 | 1049  | 15862 | 3.5147x10 <sup>-5</sup> | 0.7506  | 1.1108x10 <sup>-5</sup> | 0.89986 | 0.0045955      |
| 0.36 V                              | 17.01 | 885.4 | 5173  | 3.5966x10 <sup>-5</sup> | 0.75759 | 1.3828x10 <sup>-5</sup> | 0.88649 | 0.0047585      |
| 0.38 V                              | 17.04 | 602.9 | 2230  | 4.6456x10 <sup>-5</sup> | 0.72061 | 1.6851x10 <sup>-5</sup> | 0.8753  | 0.00054159     |
| 0.40 V                              | 17.18 | 398.6 | 1456  | 5.8542x10 <sup>-5</sup> | 0.6969  | 1.9839x10 <sup>-5</sup> | 0.86265 | 0.00063567     |
| 0.44 V                              | 17.66 | 120.6 | 1105  | 0.00010239              | 0.62763 | 3.0932x10 <sup>-5</sup> | 0.83841 | 0.0015716      |
| 0.58 V                              | 19.64 | 95.17 | 261.7 | 0.00019189              | 0.75729 | 6.4848x10 <sup>-5</sup> | 0.7687  | 0.00033661     |
| 0.60 V                              | 22.21 | 90.24 | 130   | 0.00030362              | 0.76997 | 7.5764x10 <sup>-5</sup> | 0.75782 | 0.0009636      |
| 0.64 V                              | 21.65 | 83.86 | 84.18 | 0.00056158              | 0.73407 | 5.2012x10 <sup>-5</sup> | 0.79541 | 0.0014511      |
| <i>3 M KOH + 0.150 M Urea - NiO</i> |       |       |       |                         |         |                         |         |                |
| Potential (V)                       | Rs    | R1    | R2    | CPE 2-T                 | CPE2-P  | CPE 1-T                 | CPE1-P  | X <sup>2</sup> |
| 0.30 V                              | 6.945 | 469.1 | 4905  | 0.00012759              | 0.631   | 1.7395x10 <sup>-5</sup> | 0.90613 | 0.00072724     |
| 0.34 V                              | 7.154 | 87.57 | 925.1 | 0.00050303              | 0.43767 | 2.1847x10 <sup>-5</sup> | 0.89958 | 0.00080533     |
| 0.36 V                              | 7.478 | 103.3 | 772.7 | 0.00054412              | 0.47434 | 3.3076x10 <sup>-5</sup> | 0.86825 | 0.00099556     |
| 0.38 V                              | 7.689 | 114.2 | 1337  | 0.00063086              | 0.43544 | 6.6862x10 <sup>-5</sup> | 0.8177  | 0.00098234     |
| 0.56 V                              | 8.692 | 5.662 | 96.22 | 0.00053111              | 0.48474 | 3.9807x10 <sup>-5</sup> | 0.87806 | 0.0011283      |
| 0.58 V                              | 6.929 | 4.648 | 118.8 | 0.00064334              | 0.42441 | 3.3455x10 <sup>-5</sup> | 0.9104  | 0.0090712      |
| 0.60 V                              | 8.782 | 15.83 | 210   | 0.0002179               | 0.49499 | 5.2896x10 <sup>-5</sup> | 0.86049 | 0.001484       |
| <i>6 M KOH + 0.150 M Urea - NiO</i> |       |       |       |                         |         |                         |         |                |
| Potential (V)                       | Rs    | R1    | R2    | CPE 2-T                 | CPE2-P  | CPE 1-T                 | CPE1-P  | X <sup>2</sup> |
| 0.26 V                              | 6.577 | 304.3 | 2995  | 0.00011708              | 0.57674 | 1.6717x10 <sup>-5</sup> | 0.90207 | 0.0016707      |
| 0.30 V                              | 6.573 | 30.23 | 500.7 | 0.0011774               | 0.29438 | 2.5277x10 <sup>-5</sup> | 0.89934 | 0.00043351     |
| 0.56 V                              | 8.309 | 14.7  | 48.35 | 0.0010913               | 0.57447 | 5.3966x10 <sup>-5</sup> | 0.86552 | 0.00082237     |
| 0.60 V                              | 6.827 | 29.7  | 100.1 | 0.00045578              | 0.69883 | 0.00011506              | 0.81544 | 0.001859       |
| 0.64 V                              | 9.064 | 45.04 | 81.48 | 0.00037345              | 0.77176 | 0.00011919              | 0.79132 | 0.0013519      |

| 1 M KOH +0.150 M Urea - Ni <sub>2</sub> O <sub>3</sub> |       |       |       |                         |         |                         |         |                |
|--------------------------------------------------------|-------|-------|-------|-------------------------|---------|-------------------------|---------|----------------|
| Potential (V)                                          | Rs    | R1    | R2    | CPE 2-T                 | CPE2-P  | CPE 1-T                 | CPE1-P  | X <sup>2</sup> |
| 0.34 V                                                 | 15.71 | 5.171 | 3093  | 7.6662x10 <sup>-5</sup> | 0.69995 | 1.4029x10 <sup>-5</sup> | 0.9     | 0.007714       |
| 0.36 V                                                 | 15.12 | 25.45 | 330.7 | 9.0468x10 <sup>-5</sup> | 0.51064 | 0.0001492               | 0.75629 | 0.00044331     |
| 0.38 V                                                 | 15.95 | 18.45 | 175.8 | 0.00035398              | 0.42557 | 0.0001845               | 0.73621 | 0.00037078     |
| 0.40 V                                                 | 17.44 | 14.23 | 141.7 | 0.001319                | 0.25331 | 0.00027166              | 0.69177 | 0.00047962     |
| 3 M KOH +0.150 M Urea - Ni <sub>2</sub> O <sub>3</sub> |       |       |       |                         |         |                         |         |                |
| Potential (V)                                          | Rs    | R1    | R2    | CPE 2-T                 | CPE2-P  | CPE 1-T                 | CPE1-P  | X <sup>2</sup> |
| 0.30 V                                                 | 8.172 | 810.9 | 938.4 | 6.7161x10 <sup>-6</sup> | 0.97826 | 4.3225x10 <sup>-5</sup> | 0.85938 | 0.0023386      |
| 0.32 V                                                 | 8.382 | 289.4 | 265   | 0.024806                | 0.2771  | 9.0863x10 <sup>-5</sup> | 0.83638 | 0.00059987     |
| 0.34 V                                                 | 8.764 | 146.4 | 167.8 | 0.014057                | 0.36648 | 0.00012378              | 0.81022 | 0.00047635     |
| 0.36 V                                                 | 9.086 | 82.8  | 423.7 | 0.0077401               | 0.28471 | 0.00014571              | 0.79912 | 0.00067774     |
| 0.52 V                                                 | 9.031 | 62.02 | 116.3 | 0.0028073               | 0.62939 | 0.00014907              | 0.81125 | 0.0015202      |
| 0.64 V                                                 | 9.477 | 96.66 | 87.49 | 0.0018702               | 0.63294 | 8.1524x10 <sup>-5</sup> | 0.83062 | 0.0011168      |
| 6 M KOH +0.150 M Urea - Ni <sub>2</sub> O <sub>3</sub> |       |       |       |                         |         |                         |         |                |
| Potential (V)                                          | Rs    | R1    | R2    | CPE 2-T                 | CPE2-P  | CPE 1-T                 | CPE1-P  | X <sup>2</sup> |
| 0.26 V                                                 | 6.397 | 1722  | 8568  | 2.326x10 <sup>-5</sup>  | 0.67276 | 2.1197x10 <sup>-5</sup> | 0.89634 | 0.0047241      |
| 0.30 V                                                 | 6.592 | 149.5 | 404.1 | 0.023626                | 0.23921 | 9.0437x10 <sup>-5</sup> | 0.83869 | 0.00050143     |
| 0.32 V                                                 | 6.853 | 98.79 | 373   | 0.012254                | 0.25069 | 0.00012521              | 0.81615 | 0.00143190     |

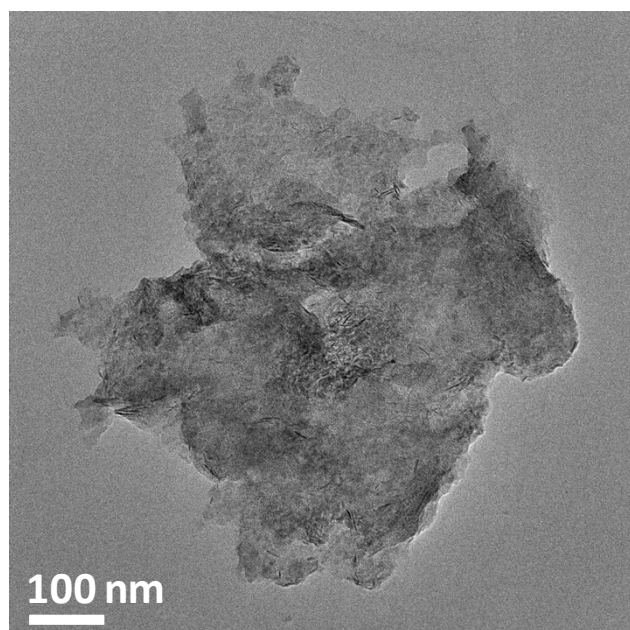

**Figure S13.** TEM image of Ni<sub>2</sub>O<sub>3</sub> after 25 hours of *i-t* measurement

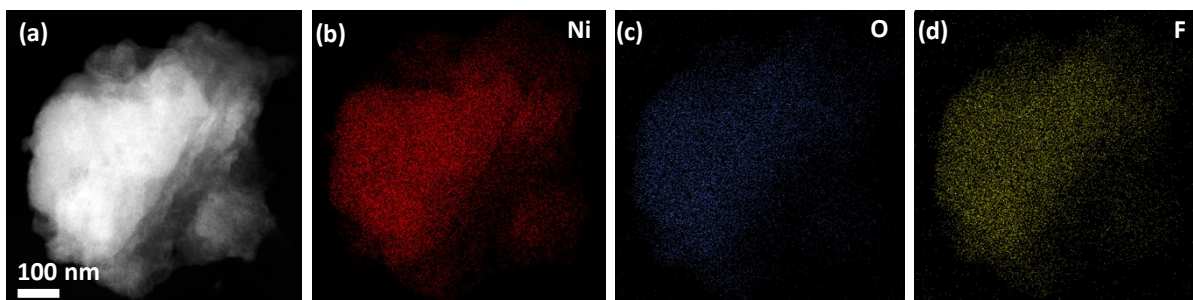

**Figure S14.** (a) HAADF image of  $\text{Ni}_2\text{O}_3$  in STEM mode after *i-t* measurement for 25 hours showing (b) nickel, (c) oxygen from  $\text{Ni}_2\text{O}_3$  and (d) fluorine from Nafion binder.

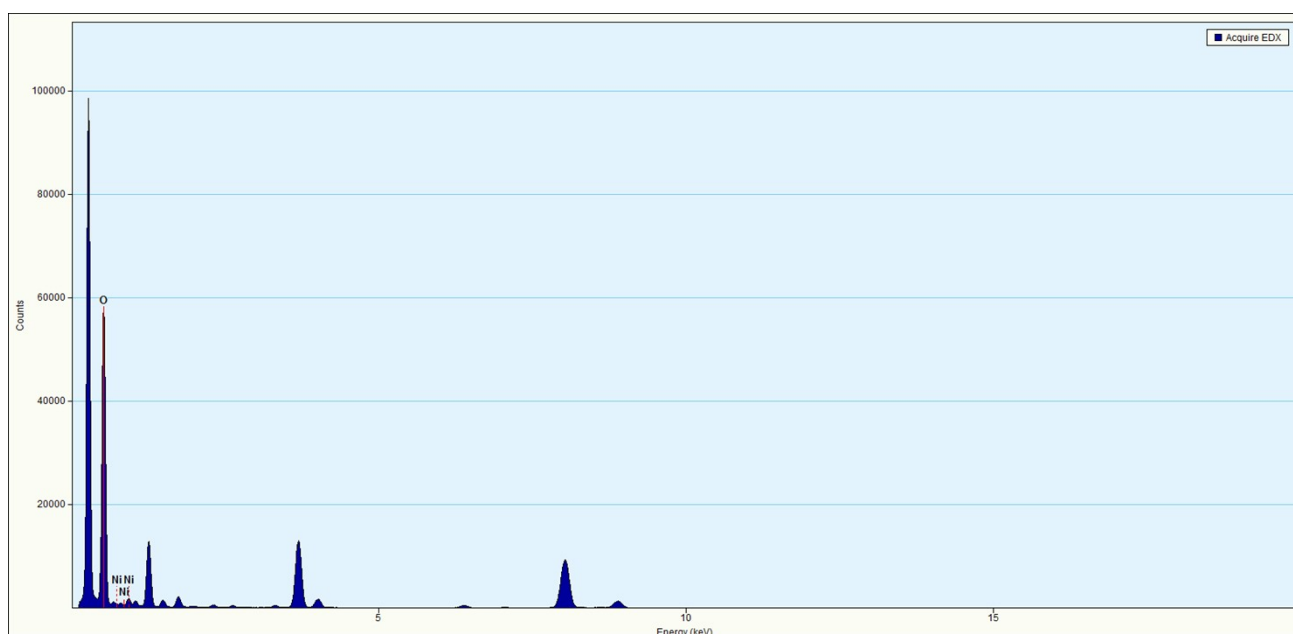

**Figure S15.** EDS analysis of  $\text{Ni}_2\text{O}_3$  catalyst after 25 hours of *i-t* measurement.

### Computational Details:

All the spin polarized calculations were performed within the framework of density functional theory (DFT) using the plane-wave technique as implemented in Vienna Ab Initio Simulation Package (VASP)<sup>2</sup>. The exchange-correlation energy was accounted within the generalized gradient approximation method (GGA) parameterized by the Perdew-Burke-Ernzerhof (PBE)<sup>3</sup>. The projector augmented wave potential (PAW) was used to treat the ion-electron interactions. The DFT-D2 empirical correction method proposed by Grimme was used for describing the effect of Vander Waals interactions<sup>4</sup>. To account for the on-site

coulomb repulsion, the Hubbard correction parameter U term (DFT+U method) was used to improve the description of localized Ni *d*-electrons in the NiO and Ni<sub>2</sub>O<sub>3</sub> surfaces with  $U_{\text{eff}} = 6.45$  as recommended by the previous studies<sup>5-6</sup>. In all computations, the kinetic energy cut off is set to be 500 eV in the plane-wave expansion. All the structures were fully relaxed (lattice constant and atomic position) using the conjugated gradient method and the convergence threshold was set to be  $10^{-4}$  eV in energy and  $0.01$  eV/Å in force. For geometry optimization, the Brillouin zone was sampled using a  $3 \times 3 \times 1$  Monkhorst-Pack k-point mesh. In order to calculate the charge transfer between different adsorbates and surfaces, we performed Bader charge-population analysis<sup>7-8</sup>. For geometry optimization of the small molecules namely CO<sub>2</sub> and urea (CO(NH<sub>2</sub>)<sub>2</sub>) in gas phase we used B3LYP/6-31+G (d, p) method as implemented in Gaussian 16<sup>9</sup>. The adsorption energies ( $E_{\text{ad}}$ ) of the adsorbates namely OH, CO<sub>2</sub> and CO(NH<sub>2</sub>)<sub>2</sub> on various surfaces could be defined as

$$E_{\text{ad}} = E_{\text{surface+adsorbate}} - E_{\text{surface}} - E_{\text{adsorbate}} \quad (1)$$

where  $E_{\text{surface+adsorbate}}$  and  $E_{\text{surface}}$  are the energies of adsorbate adsorbed surfaces and pristine surfaces respectively while  $E_{\text{adsorbate}}$  is the energy of the adsorbate.<sup>10-11</sup>

According to HRTEM analysis, the surface exposed planes for NiO and Ni<sub>2</sub>O<sub>3</sub> surfaces are (111) and (002) respectively. In order to model polar NiO (111) surface, we have considered two type of surface terminations namely Ni-terminated and O-terminated surfaces as suggested by earlier studies.<sup>4,11</sup> The modeled rectangular periodic surface slab ( $11.55 \times 8.87$  Å<sup>2</sup>) of Ni-terminated NiO (111) surface consists of 132 atoms while O-terminated surface slab ( $12.06 \times 8.73$  Å<sup>2</sup>) consists of 154 atoms. On the contrary, Ni<sub>2</sub>O<sub>3</sub> (002) surface with one stable Ni-O termination was constructed with a rectangular periodic ( $3 \times 2$ ) surface slab ( $13.03 \times 9.22$  Å<sup>2</sup>) of 120 atoms. To avoid the spurious interactions between the neighbouring slabs, a vacuum layer of 20 Å was used in the direction perpendicular to the surfaces (along Z-direction) and the nearest distance between the two adsorbed molecules in the adjacent supercell is  $\sim 12$  Å.



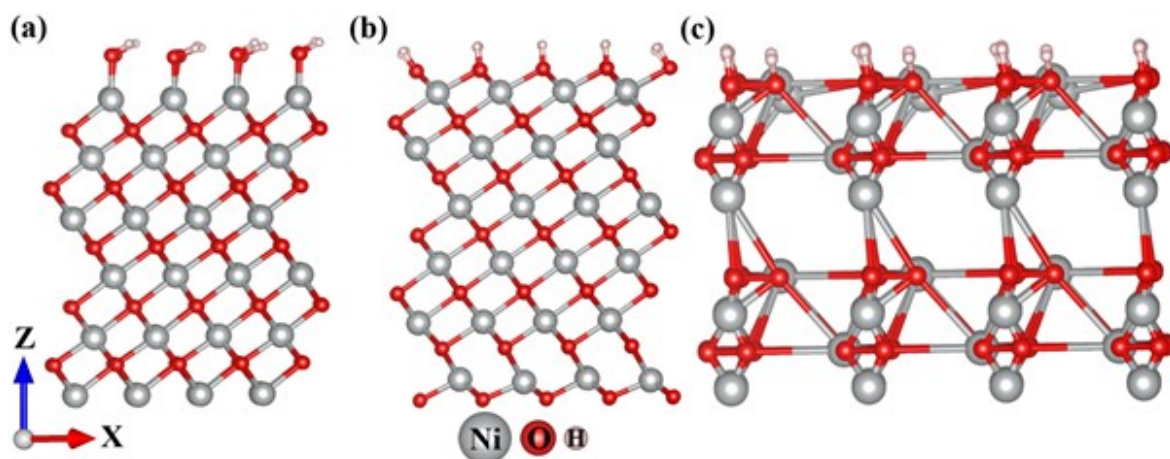

**Figure S16.** Optimized structures of different in-situ generated hydroxylated surfaces (a) Ni-terminated NiO (111), (b) O-terminated NiO (111), (c) Ni<sub>2</sub>O<sub>3</sub> (002).

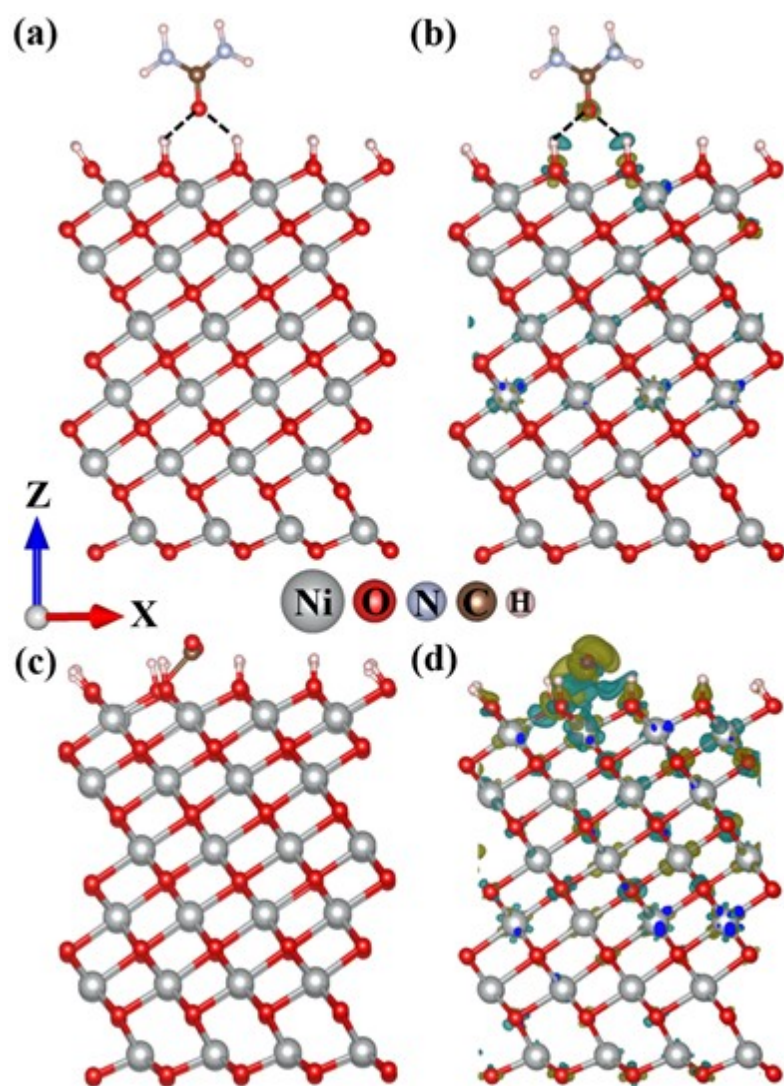

**Figure S17.** Optimized structures and corresponding charge density difference (CDD) plots of O-terminated NiO (111) surfaces (a-b) urea adsorbed, (c-d) CO<sub>2</sub> adsorbed surfaces. Isodensity value at surfaces is  $\pm 0.004$  e/a.u.<sup>3</sup> (positive: cyan and negative: olive) of CDD.

**Table S6.** Reaction pathway for electrochemical urea oxidation

| Steps | Reactions                                                                                                                                                                                         |
|-------|---------------------------------------------------------------------------------------------------------------------------------------------------------------------------------------------------|
| 1     | $\text{NiOOH} + \text{CO}(\text{NH}_2)_2 \rightarrow [\text{NiOOH} \cdot \text{CO}(\text{NH}_2)_2]_{\text{ads}}$                                                                                  |
| 2     | $[\text{NiOOH} \cdot \text{CO}(\text{NH}_2)_2]_{\text{ads}} + \text{OH}^- \rightarrow [\text{NiOOH} \cdot \text{CO}(\text{NH}_2 \cdot \text{NH})]_{\text{ads}} + \text{H}_2\text{O} + \text{e}^-$ |
| 3     | $[\text{NiOOH} \cdot \text{CO}(\text{NH}_2 \cdot \text{NH})]_{\text{ads}} + \text{OH}^- \rightarrow [\text{NiOOH} \cdot \text{CONH}_2\text{N}]_{\text{ads}} + \text{H}_2\text{O} + \text{e}^-$    |
| 4     | $[\text{NiOOH} \cdot \text{CONH}_2\text{N}]_{\text{ads}} + \text{OH}^- \rightarrow [\text{NiOOH} \cdot \text{CONHN}]_{\text{ads}} + \text{H}_2\text{O} + \text{e}^-$                              |
| 5     | $[\text{NiOOH} \cdot \text{CONHN}]_{\text{ads}} + \text{OH}^- \rightarrow [\text{NiOOH} \cdot \text{CO} \cdot \text{N}_2]_{\text{ads}} + \text{H}_2\text{O} + \text{e}^-$                         |
| 6     | $[\text{NiOOH} \cdot \text{CO} \cdot \text{N}_2]_{\text{ads}} + \text{OH}^- \rightarrow [\text{NiOOH} \cdot \text{CO} \cdot \text{OH}]_{\text{ads}} + \text{N}_2 + \text{e}^-$                    |
| 7     | $[\text{NiOOH} \cdot \text{CO} \cdot \text{OH}]_{\text{ads}} + \text{OH}^- \rightarrow [\text{NiOOH} \cdot \text{CO}_2]_{\text{ads}} + \text{H}_2\text{O} + \text{e}^-$                           |
| 8     | $[\text{NiOOH} \cdot \text{CO}_2]_{\text{ads}} \rightarrow \text{NiOOH} + \text{CO}_2$                                                                                                            |

\*Ref<sup>12</sup>

**Table S7.** Adsorption energies of NiO and Ni<sub>2</sub>O<sub>3</sub> catalyst for OH, urea and CO<sub>2</sub>

| Sample                         | OH adsorption energy | Urea adsorption energy | CO <sub>2</sub> adsorption energy |
|--------------------------------|----------------------|------------------------|-----------------------------------|
| NiO                            | -0.75 eV             | -0.14 eV               | -0.98 eV                          |
| Ni <sub>2</sub> O <sub>3</sub> | -0.98 eV             | -0.85 eV               | -0.45 eV                          |

**Table S8.** Performance comparison of UOR using Nickel-based catalyst

| Sl. No | Catalyst and base electrode                                       | Synthesis method                  | Electrolyte KOH + Urea | Onset potential                          | Tafel slope (mV/dec) | Current density (mA cm <sup>-2</sup> )                       | Stability | Ref                                                         |
|--------|-------------------------------------------------------------------|-----------------------------------|------------------------|------------------------------------------|----------------------|--------------------------------------------------------------|-----------|-------------------------------------------------------------|
| 1.     | MnO <sub>2</sub> /MnCo <sub>2</sub> O <sub>4</sub> on Nickel foam | Hydrothermal                      | 1 M + 0.5 M            | 1.33 V vs. RHE                           | 72 mV/dec            | 10                                                           | 15 h      | <b>13</b> <i>J. Mater. Chem. A</i> , 2017, <b>5</b> , 3208. |
| 2.     | Ni <sub>2</sub> P NF on Carbon cloth                              | Hydrothermal                      | 1 M + 0.5 M            | 0.38 V vs. SCE for 60 mAcm <sup>-2</sup> | 49 mV/dec            | Chronopotentiometry at 0.4 V vs. SCE (70mAcm <sup>-2</sup> ) | 8 h       | <b>14</b>                                                   |
| 3.     | Ni-Sn sulfide on                                                  | Hydrothermal followed by alkaline | 1 M + 0.33 M           | 1.36 V vs. RHE                           | 32.2                 | 10                                                           | 12 h      | <b>15</b>                                                   |

|     |                                                                 |                                                            |                      |                                            |                  |                                                                           |             |                                                                  |
|-----|-----------------------------------------------------------------|------------------------------------------------------------|----------------------|--------------------------------------------|------------------|---------------------------------------------------------------------------|-------------|------------------------------------------------------------------|
|     | Carbon paper                                                    | solution etching                                           |                      | for 10 mAcm <sup>-2</sup>                  | mV/dec           |                                                                           |             |                                                                  |
| 4.  | MoP@NiCo – LDH on <b>Nickel foam</b>                            | Hydrothermal followed by electrodeposition                 | 1 M + 0.5 M          | 1.392 V vs. RHE for 100 mAcm <sup>-2</sup> | 40 mV/dec        | 100                                                                       | 20 h        | <b>16</b> <i>J. Mater. Chem. A</i> , 2020, <b>8</b> , 18106      |
| 5.  | Porous Ni(OH) <sub>2</sub> nanosheet on GCE                     | Microwave assisted synthesis                               | 1 M + 0.33 M         | 1.82 V vs. RHE for 298 mAcm <sup>-2</sup>  | 43 mV/dec        | 45                                                                        | 10 h        | 17                                                               |
| 6.  | α – Ni(OH) <sub>2</sub> nanosheets on Carbon cloth              | Hydrothermal                                               | 1 M + 0.33 M         | -----                                      | -----            | 300 mAcm <sup>-2</sup> degraded to 175 mAcm <sup>-2</sup> in 10 h         | 10 h        | <b>18</b>                                                        |
| 7.  | LaNiO <sub>3</sub> on GCE                                       | Reverse phase hydrolysis                                   | 5 M + 0.33 M         | 0.40 V vs. Hg/HgO                          | -----            | 600 mAcm <sup>-2</sup> degraded to 150 mAcm <sup>-2</sup> in 1200 seconds | 1200 s      | <b>19</b>                                                        |
| 8.  | Ni <sub>1.5</sub> Mn <sub>1.5</sub> O <sub>4</sub> on GCE       | Hydrothermal                                               | 1 M + 0.33 M         | 0.29 V vs. Ag/AgCl                         | -----            | 20                                                                        | 1000 s      | <b>20</b>                                                        |
| 9.  | CNT/C@FeNi on Carbon paper                                      | Pyrolysis                                                  | 1 M + 60 mM          | -----                                      | 33 mV/dec        | 0.85                                                                      | 3 h         | <b>21</b>                                                        |
| 10. | 2D MOF – Ni on GCE                                              | Sonication assisted solution method                        | 1 M + 0.33 M         | 1.36 V vs. RHE for 10 mAcm <sup>-2</sup>   | 23 mV/dec        | 20                                                                        | 10 h        | 22                                                               |
| 11. | 3D – Ni <sub>x</sub> Co <sub>2-x</sub> P /C@HCN on Carbon cloth | Hydrothermal followed by carbonization and phosphorization | 1 M + 0.33 M         | 1.33 V vs. RHE for 10 mAcm <sup>-2</sup>   | 74.6 mV/dec      | 40                                                                        | 6 h         | <b>23</b>                                                        |
| 12. | β – NiMoO <sub>4</sub> on Carbon cloth                          | Hydrothermal                                               | 1 M + 0.5 M          | 1.36 V vs. RHE                             | 48 mV/dec        | 20                                                                        | 30 h        | <b>24</b> <i>ACS Appl. Energy Mater.</i> , 2020, <b>3</b> , 7535 |
| 13. | C@NiO on GCE                                                    | Hydrothermal followed by pyrolysis                         | 1 M + 0.33 M         | 1.36 V vs. RHE for 10 mAcm <sup>-2</sup>   | 87.2 mV/dec      | 0.015                                                                     | 1800 s      | <b>25</b>                                                        |
| 14. | Ni <sup>0</sup> rich –Ni/NiO Grown on <b>Nickel Foam</b>        | Ar/H <sub>2</sub> annealing                                | 1 M + 0.33 M         | 1350 mV vs. RHE                            | -----            | 50                                                                        | 20 h        | <b>26</b> <i>Appl. Surf. Sci.</i> , 2019, <b>496</b> , 143710    |
| 15. | Rh-NCs/NiO-NSs on GCE                                           | Mixed cynogels-NaBH <sub>4</sub> method                    | 1 M + 0.33 M         | 1.55 V vs. RHE for 616 mAcm <sup>-1</sup>  | 36.6 mV/dec      | 50 mA/g                                                                   | 6000 s      | 27                                                               |
| 16. | Ni-WOx on Nickel foam                                           | Coprecipitation                                            | 1 M + 0.33 M         | 1.40 V vs. RHE for 100 mAcm <sup>-2</sup>  | 39 mV/dec        | 100                                                                       | 10 h        | 28 <i>Angew. Chemie - Int. Ed.</i> , 2021, <b>60</b> , 10577     |
| 17. | Mn – Ni <sub>3</sub> S <sub>2</sub> on Nickel foam              | Hydrothermal                                               | 1 M + 0.5 M          | 1.303 V vs. RHE for 10 mAcm <sup>-2</sup>  | 41.7 mV/dec      | 50                                                                        | 5.5 h       | 29                                                               |
| 18. | <b>Ni<sub>2</sub>O<sub>3</sub> on GCE</b>                       | <b>Precipitation method</b>                                | <b>1 M + 0.150 M</b> | <b>0.340 V vs. Ag/AgCl (1.36 V vs RHE)</b> | <b>21 mV/dec</b> | <b>25</b>                                                                 | <b>25 h</b> | <b>This work</b>                                                 |

In the above comparative table, NiO based catalysts with reported stability test  $\geq 15$  h are highlighted. It can be seen that the UOR performance parameter, Tafel slope, a measure of the kinetics, is the lowest obtained in our case compared to all the reported ones. The urea concentration is also quite low, 0.15 M in the present case. Only one catalyst has reported stability for 30 h but still possesses higher Tafel slope and lower current density than Ni<sub>2</sub>O<sub>3</sub>. A few catalysts have reported higher current density  $> 50$  mA/cm<sup>2</sup>, but it may be noted that such higher current density is observed only for catalysts grown on Ni foam electrodes, which itself contribute to the performance largely.

## References

- 1 C. C. L. McCrory, S. Jung, J. C. Peters and T. F. Jaramillo, *J. Am. Chem. Soc.*, 2013, **135**, 16977–16987.
- 2 G. Kresse and J. Hafner, *Phys. Rev. B* 1993, **47**, 558.
- 3 J. P. Perdew, K. Burke, M. Ernzerhof, *Phys. Rev. Lett*, 1996, **77**, 3865
- 4 S. Grimme, *J. Comput. Chem*, 2006, **27**, 1787-1799.
- 5 W. Zhao, M. Bajdich, S. Carey, A. Vojvodic, J. K. Nørskov and C.T. Campbell, *ACS Catal.* 2016, **6**, 11, 7377-84.
- 6 L. Wang, T. Maxisch and G. Ceder, *Phys. Rev. B*, 2006, **73**, 195107.
- 7 R. F. W. Bader, *Atoms in Molecules: A Quantum Theory* (Oxford University Press, Oxford, 1990).
- 8 G. Henkelman, A. Arnaldsson and H. Jónsson, *Comput. Mater. Sci*, 2006, **36**, 354–360.
- 9 M. J. Frisch, et al., *Gaussian 16*, revision C.01; Gaussian, Inc.: Wallingford, CT, 2016.
- 10 R. Jana, C. Chowdhury, S. Malik, and A. Datta, *ACS Appl. Energy Mater*, 2019, **2**, 5613–5621.
- 11 R. Jana, A. Datta and S. Malik, *Chem. Commun*, 2021, **57**, 4508-4511.
- 12 S. Lu, M. Hummel, S. Kang, R. Pathak, W. He, X. Qi and Z. Gu, *ACS Omega*. 2021, **6**, 22, 14648-14654.
- 13 C. Xiao, S. Li, X. Zhang and D. R. MacFarlane, *J. Mater. Chem. A*, 2017, **5**, 7825–7832.
- 14 D. Liu, T. Liu, L. Zhang, F. Qu, G. Du, A. M. Asiri and X. Sun, *J. Mater. Chem. A*, 2017, **5**, 3208–3213.
- 15 Z. Ji, J. Liu, Y. Deng, S. Zhang, Z. Zhang, P. Du, Y. Zhao and X. Lu, *J. Mater. Chem. A*, 2020, **8**, 14680–14689.
- 16 T. Wang, H. Wu, C. Feng, L. Zhang and J. Zhang, *J. Mater. Chem. A*, 2020, **8**, 18106–18116.

- 17 W. Yang, X. Yang, B. Li, J. Lin, H. Gao, C. Hou and X. Luo, *J. Mater. Chem. A*, 2019, **7**, 26364–26370.
- 18 C. Lin, Z. Gao, F. Zhang, J. Yang, B. Liu and J. Jin, *J. Mater. Chem. A*, 2018, **6**, 13867–13873.
- 19 R. P. Forslund, J. T. Mefford, W. G. Hardin, C. T. Alexander, K. P. Johnston and K. J. Stevenson, *ACS Catal.*, 2016, **6**, 5044–5051.
- 20 S. Periyasamy, P. Subramanian, E. Levi, D. Aurbach, A. Gedanken and A. Schechter, *ACS Appl. Mater. Interfaces*, 2016, **8**, 12176–12185.
- 21 A. Modak, R. Mohan, K. Rajavelu, R. Cahan, T. Bendikov and A. Schechter, *ACS Appl. Mater. Interfaces*, 2021, **13**, 8461–8473.
- 22 D. Zhu, C. Guo, J. Liu, L. Wang, Y. Du and S. Z. Qiao, *Chem. Commun.*, 2017, **53**, 10906–10909.
- 23 S. Rezaee and S. Shahrokhian, *Nanoscale*, 2020, **12**, 16123–16135.
- 24 K. Hu, S. Jeong, G. Elumalai, S. Kukunuri, J. I. Fujita and Y. Ito, *ACS Appl. Energy Mater.*, 2020, **3**, 7535–7542.
- 25 S. Lu, M. Hummel, Z. Gu, Y. Wang, K. Wang, R. Pathak, Y. Zhou, H. Jia, X. Qi, X. Zhao, B. Bin Xu and X. Liu, *ACS Sustain. Chem. Eng.*, 2021, **9**, 1703–1713.
- 26 B. Zhang, S. Wang, Z. Ma and Y. Qiu, *Appl. Surf. Sci.*, 2019, **496**, 143710.
- 27 G. Ma, Q. Xue, J. Zhu, X. Zhang, X. Wang, H. Yao, G. Zhou and Y. Chen, *Appl. Catal. B Environ.*, 2020, **265**, 1–9.
- 28 L. Wang, Y. Zhu, Y. Wen, S. Li, C. Cui, F. Ni, Y. Liu, H. Lin, Y. Li, H. Peng and B. Zhang, *Angew. Chemie - Int. Ed.*, 2021, **60**, 10577–10582.
- 29 H. Yang, M. Yuan, Z. Sun, D. Wang, L. Lin, H. Li and G. Sun, *ACS Sustain. Chem. Eng.*, 2020, **8**, 8348–8355.
